# Supplementary material
Source: publisher site journal article supplement (https://www.spandidos-publications.com/331/downloadSupplementary)
Supplement: Supplementary file 1 [file downloadSupplementary]

## Sheet: 443
Table SI. Detailed information of patients with colorectal cancer in each Tumor-Node-Metastasis stage. 0, living; 1, succumbed.
ID	Time (days)	Status	Age, years	Sex	Stage	T	M	N
TCGA-AA-3667	426	0	36	FEMALE	I	T2	M0	N0
TCGA-QL-A97D	666	0	84	FEMALE	I	T2	MX	N0
TCGA-D5-6923	378	0	57	MALE	I	T2	M0	N0
TCGA-AD-5900	370	0	67	MALE	I	T2	MX	N0
TCGA-F4-6808	1024	0	54	FEMALE	I	T1	M0	N0
TCGA-D5-6540	491	0	66	MALE	I	T2	M0	N0
TCGA-AA-3514	31	0	81	FEMALE	I	T2	M0	N0
TCGA-CM-6161	212	0	36	FEMALE	I	T2	M0	N0
TCGA-AA-3543	30	0	84	MALE	I	T2	M0	N0
TCGA-AY-A54L	525	0	74	FEMALE	I	T2	M0	N0
TCGA-F4-6856	591	0	45	MALE	I	T2	M0	N0
TCGA-A6-6138	280	0	61	MALE	I	T2	M0	N0
TCGA-CM-6166	424	0	48	FEMALE	I	T2	M0	N0
TCGA-A6-5656	462	0	74	MALE	I	T2	M0	N0
TCGA-D5-6898	229	0	51	FEMALE	I	T2	M0	N0
TCGA-AA-3877	943	0	83	FEMALE	I	T1	M0	N0
TCGA-CM-6170	242	0	73	FEMALE	I	T2	M0	N0
TCGA-A6-6653	282	0	82	MALE	I	T2	M0	N0
TCGA-AA-A00D	578	0	70	MALE	I	T2	M0	N0
TCGA-CK-6751	3780	0	88	FEMALE	I	T2	MX	N0
TCGA-AA-3502	1065	0	73	MALE	I	T2	M0	N0
TCGA-CM-6676	153	0	82	MALE	I	T2	M0	N0
TCGA-AD-A5EK	500	0	51	MALE	I	T2	MX	N0
TCGA-CK-5915	0	0	63	MALE	I	T2	MX	N0
TCGA-AA-3530	580	0	80	MALE	I	T2	M0	N0
TCGA-AY-A71X	588	0	54	FEMALE	I	T2	M0	N0
TCGA-AA-A01I	943	0	76	MALE	I	T2	M0	N0
TCGA-AA-3821	31	0	81	FEMALE	I	T2	M0	N0
TCGA-G4-6323	419	0	50	MALE	I	Tis	MX	N0
TCGA-AA-3495	1127	0	79	MALE	I	T2	M0	N0
TCGA-AA-3858	945	0	67	MALE	I	T2	M0	N0
TCGA-AA-3968	669	0	55	FEMALE	I	T2	M0	N0
TCGA-CM-4744	214	0	69	MALE	I	T2	M0	N0
TCGA-AU-6004	824	0	69	FEMALE	I	T2	M0	N0
TCGA-AZ-4313	1532	0	51	FEMALE	I	T1	M0	N0
TCGA-AA-A00R	30	0	64	FEMALE	I	T2	M0	N0
TCGA-QG-A5Z2	952	0	61	MALE	I	T2	M0	N0
TCGA-AA-3855	975	0	72	MALE	I	T2	M0	N0
TCGA-AA-3544	426	0	68	MALE	I	T2	M0	N0
TCGA-AA-A02W	1247	0	73	FEMALE	I	T2	M0	N0
TCGA-AA-3850	0	1	74	MALE	I	T2	M0	N0
TCGA-AZ-6599	206	1	72	MALE	I	T2	MX	N0
TCGA-AA-A02Y	1216	0	73	MALE	I	T2	M0	N0
TCGA-CM-6163	427	0	74	MALE	I	T1	M0	N0
TCGA-AZ-5407	1868	0	51	FEMALE	I	T1	M0	N0
TCGA-CK-5916	643	1	71	FEMALE	I	T1	M0	N0
TCGA-G4-6628	1606	0	78	MALE	I	T2	M0	N0
TCGA-AA-3556	700	0	78	MALE	I	T2	M0	N0
TCGA-A6-5659	286	0	82	MALE	I	T2	M0	N0
TCGA-AY-4071	29	1	63	FEMALE	I	T1	unknown	N0
TCGA-F4-6569	409	0	60	MALE	I	T2	M0	N0
TCGA-CK-5912	1493	1	81	MALE	I	T2	MX	N0
TCGA-D5-7000	312	0	79	FEMALE	I	T2	M0	N0
TCGA-AA-3538	791	0	54	FEMALE	I	T2	M0	N0
TCGA-AA-3986	580	0	73	MALE	I	T2	M0	N0
TCGA-AD-6548	650	0	81	FEMALE	I	T2	M0	N0
TCGA-AA-3549	639	0	69	MALE	I	T2	M0	N0
TCGA-CM-4746	699	0	61	MALE	I	T2	M0	N0
TCGA-F4-6806	481	0	59	FEMALE	I	T2	M0	N0
TCGA-D5-6530	621	0	53	MALE	I	T2	M0	N0
TCGA-AA-3506	1765	0	77	MALE	I	T2	M0	N0
TCGA-AA-3875	549	0	78	FEMALE	I	T1	M0	N0
TCGA-AA-3975	1036	0	80	MALE	I	T2	M0	N0
TCGA-AA-A03J	1246	0	65	FEMALE	I	T2	M0	N0
TCGA-AA-A00W	456	0	80	MALE	I	T1	M0	N0
TCGA-AA-3553	730	0	61	FEMALE	I	T2	M0	N0
TCGA-3L-AA1B	349	0	61	FEMALE	I	T2	M0	N0
TCGA-CM-6171	182	0	77	FEMALE	I	T2	M0	N0
TCGA-AA-3526	580	0	57	MALE	I	T2	M0	N0
TCGA-AA-3866	518	0	78	FEMALE	I	T2	M0	N0
TCGA-AA-A01V	31	0	59	MALE	I	T2	M0	N0
TCGA-AA-3980	822	0	89	FEMALE	I	T2	M0	N0
TCGA-AA-3854	1096	0	71	FEMALE	I	T2	M0	N0
TCGA-CM-5864	61	0	60	MALE	I	T2	M0	N0
TCGA-A6-2684	387	0	75	FEMALE	I	T2	M0	N0
TCGA-CM-6677	153	0	75	FEMALE	II	T3	M0	N0
TCGA-AA-A00Z	669	0	70	MALE	II	T3	M0	N0
TCGA-D5-6927	287	0	34	MALE	II	T3	M0	N0
TCGA-AA-3979	730	0	84	MALE	II	T3	M0	N0
TCGA-AA-A01Z	1126	0	68	MALE	II	T3	M0	N0
TCGA-AA-3518	31	0	81	FEMALE	II	T3	M0	N0
TCGA-A6-2681	552	0	73	FEMALE	II	T3	M0	N0
TCGA-AA-A00E	913	0	65	MALE	II	T3	M0	N0
TCGA-DM-A1D4	2821	1	80	MALE	II	T3	M0	N0
TCGA-AA-3861	914	0	72	MALE	II	T3	M0	N0
TCGA-AZ-5403	1910	1	43	MALE	II	T3	MX	N0
TCGA-AU-3779	441	0	80	FEMALE	II	T3	M0	N0
TCGA-A6-2686	488	0	81	FEMALE	II	T3	M0	N0
TCGA-WS-AB45	2130	0	52	FEMALE	II	T3	MX	N0
TCGA-A6-6782	189	0	82	MALE	II	T4a	MX	N0
TCGA-G4-6586	1089	0	73	FEMALE	II	T3	M0	N0
TCGA-AA-3862	914	0	82	MALE	II	T3	M0	N0
TCGA-D5-5540	411	0	73	MALE	II	T3	M0	N0
TCGA-AA-3489	214	1	75	MALE	II	T3	M0	N0
TCGA-AA-3527	0	0	90	FEMALE	II	T3	M0	N0
TCGA-CK-6747	89	0	87	FEMALE	II	T3	MX	N0
TCGA-A6-3810	247	0	62	MALE	II	T3	M0	N0
TCGA-A6-3808	279	0	73	MALE	II	T3	M0	N0
TCGA-CM-6674	150	0	39	MALE	II	T3	M0	N0
TCGA-AA-3939	395	0	83	MALE	II	T3	M0	N0
TCGA-AA-3517	1186	0	60	MALE	II	T3	M0	N0
TCGA-AA-3947	1004	0	60	FEMALE	II	T4	M0	N0
TCGA-D5-6541	474	0	49	MALE	II	T3	M0	N0
TCGA-AY-6197	423	0	60	MALE	II	T3	unknown	N0
TCGA-AA-3496	31	0	83	FEMALE	II	T3	M0	N0
TCGA-CA-6718	306	1	46	MALE	II	T3	M0	N0
TCGA-DM-A1D9	4270	0	67	FEMALE	II	T3	M0	N0
TCGA-DM-A1DB	1348	1	68	MALE	II	T3	M0	N0
TCGA-NH-A50T	553	0	68	FEMALE	II	T3	MX	N0
TCGA-CM-6679	122	0	58	MALE	II	T3	M0	N0
TCGA-AA-3966	61	0	89	FEMALE	II	T3	M0	N0
TCGA-AA-3511	212	0	64	MALE	II	T4	M0	N0
TCGA-AA-A017	457	0	57	FEMALE	II	T3	M0	N0
TCGA-A6-5666	362	0	78	MALE	II	T4b	M0	N0
TCGA-AA-3814	0	0	85	FEMALE	II	T3	M0	N0
TCGA-AA-3492	92	1	90	FEMALE	II	T3	M0	N0
TCGA-CM-6164	487	0	46	FEMALE	II	T3	M0	N0
TCGA-F4-6703	1091	0	64	MALE	II	T3	M0	N0
TCGA-DM-A28K	2988	0	75	MALE	II	T3	M0	N0
TCGA-AM-5821	28	0	68	FEMALE	II	T3	M0	N0
TCGA-DM-A1D7	405	1	82	MALE	II	T3	M0	N0
TCGA-CA-5255	93	0	45	MALE	II	T3	M0	N0
TCGA-CM-5861	335	0	63	FEMALE	II	T3	M0	N0
TCGA-AA-A00N	122	1	75	MALE	II	T4	M0	N0
TCGA-A6-6141	255	0	31	MALE	II	T3	M0	N0
TCGA-AA-3660	2375	0	51	FEMALE	II	T3	M0	N0
TCGA-AA-A029	1581	0	67	MALE	II	T3	M0	N0
TCGA-CK-5913	1561	0	58	FEMALE	II	T3	MX	N0
TCGA-CM-6169	243	0	67	MALE	II	T3	M0	N0
TCGA-AA-3520	731	0	86	FEMALE	II	T3	M0	N0
TCGA-AA-3673	1522	0	53	FEMALE	II	T3	M0	N0
TCGA-AA-3950	730	0	79	FEMALE	II	T3	M0	N0
TCGA-AA-3534	882	0	78	FEMALE	II	T3	M0	N0
TCGA-D5-6529	614	0	69	MALE	II	T3	M0	N0
TCGA-DM-A282	4233	0	60	FEMALE	II	T3	M0	N0
TCGA-D5-6532	555	0	61	MALE	II	T3	M0	N0
TCGA-A6-4105	442	1	79	MALE	II	T3	M0	N0
TCGA-A6-6780	354	0	74	MALE	II	T3	MX	N0
TCGA-AA-3819	761	0	41	FEMALE	II	T3	M0	N0
TCGA-CA-5797	100	0	56	MALE	II	T3	M0	N0
TCGA-A6-3809	314	0	71	FEMALE	II	T4	M0	N0
TCGA-AA-3710	821	0	80	FEMALE	II	T3	M0	N0
TCGA-AA-3812	1066	0	82	FEMALE	II	T3	M0	N0
TCGA-D5-6930	406	0	67	MALE	II	T3	M0	N0
TCGA-F4-6570	188	1	78	FEMALE	II	T3	M0	N0
TCGA-5M-AATE	1200	0	76	MALE	II	T3	M0	N0
TCGA-CA-5254	68	0	42	FEMALE	II	T3	M0	N0
TCGA-G4-6304	1631	0	66	FEMALE	II	T4	M0	N0
TCGA-AA-3851	1006	0	74	MALE	II	T3	M0	N0
TCGA-AA-3521	0	0	87	MALE	II	T3	M0	N0
TCGA-AA-A02O	28	0	82	MALE	II	T3	M0	N0
TCGA-AA-3833	485	0	63	FEMALE	II	T3	M0	N0
TCGA-F4-6855	1077	0	70	FEMALE	II	T3	M0	N0
TCGA-AD-6889	2056	0	76	MALE	II	T3	M0	N0
TCGA-DM-A1D0	3974	0	79	FEMALE	II	T3	M0	N0
TCGA-F4-6805	496	0	58	FEMALE	II	T3	M0	N0
TCGA-AZ-6601	3042	1	68	MALE	II	T3	M0	N0
TCGA-D5-6928	354	0	80	MALE	II	T3	M0	N0
TCGA-AA-3554	546	0	62	FEMALE	II	T3	M0	N0
TCGA-AD-A5EJ	0	0	74	FEMALE	II	T3	MX	N0
TCGA-DM-A28M	2895	0	63	MALE	II	T3	M0	N0
TCGA-AA-3664	1643	0	74	FEMALE	II	T3	M0	N0
TCGA-A6-2675	846	0	78	MALE	II	T3	MX	N0
TCGA-A6-6650	278	0	69	FEMALE	II	T3	M0	N0
TCGA-DM-A0X9	3641	0	71	FEMALE	II	T3	M0	N0
TCGA-G4-6625	2792	0	77	FEMALE	II	T3	M0	N0
TCGA-F4-6463	415	0	51	MALE	II	T3	M0	N0
TCGA-F4-6854	16	0	77	FEMALE	II	T3	M0	N0
TCGA-AA-3837	1186	0	67	MALE	II	T3	M0	N0
TCGA-NH-A5IV	588	0	90	FEMALE	II	T3	MX	N0
TCGA-AA-3685	1127	0	69	MALE	II	T3	M0	N0
TCGA-DM-A0XD	743	1	65	MALE	II	T3	M0	N0
TCGA-AA-A024	1188	1	81	MALE	II	T3	M0	N0
TCGA-CM-4752	123	0	58	MALE	II	T3	M0	N0
TCGA-CM-6168	181	0	84	FEMALE	II	T3	M0	N0
TCGA-AA-3510	1946	0	70	MALE	II	T3	M0	N0
TCGA-AA-3846	518	0	74	FEMALE	II	T3	M0	N0
TCGA-AA-3956	1035	0	65	MALE	II	T3	M0	N0
TCGA-AA-A01G	365	0	63	MALE	II	T3	M0	N0
TCGA-G4-6295	254	0	70	FEMALE	II	T3	M0	N0
TCGA-DM-A28E	3648	0	72	FEMALE	II	T3	M0	N0
TCGA-CM-6165	212	0	74	MALE	II	T3	M0	N0
TCGA-AA-3970	1096	0	65	MALE	II	T3	M0	N0
TCGA-AA-3852	0	1	88	MALE	II	T3	M0	N0
TCGA-AA-3818	30	1	78	FEMALE	II	T3	M0	N0
TCGA-AA-A004	424	0	76	MALE	II	T3	M0	N0
TCGA-AA-3524	1096	0	85	MALE	II	T3	M0	N0
TCGA-AA-3697	2587	0	77	MALE	II	T3	M0	N0
TCGA-4T-AA8H	349	0	42	FEMALE	II	T3	MX	N0
TCGA-D5-6924	435	0	68	MALE	II	T3	M0	N0
TCGA-A6-2685	464	0	48	FEMALE	II	T3	M0	N0
TCGA-AA-3531	1035	0	75	FEMALE	II	T3	M0	N0
TCGA-AA-3663	212	0	42	MALE	II	T3	M0	N0
TCGA-AA-3831	547	0	66	MALE	II	T3	M0	N0
TCGA-CM-4743	184	0	69	MALE	II	T3	M0	N0
TCGA-CA-6716	371	0	65	MALE	II	T3	M0	N0
TCGA-CA-6717	388	0	57	MALE	II	T3	M0	N0
TCGA-AA-A010	1064	0	46	FEMALE	II	T4	M0	N0
TCGA-AA-3509	1915	0	54	FEMALE	II	T3	M0	N0
TCGA-CA-6719	435	0	77	MALE	II	T3	M0	N0
TCGA-AA-3561	424	0	72	MALE	II	T3	M0	N0
TCGA-AA-3984	0	0	61	FEMALE	II	T3	M0	N0
TCGA-CA-5796	99	0	52	FEMALE	II	T3	M0	N0
TCGA-DM-A28C	2475	1	74	MALE	II	T3	M0	N0
TCGA-AA-3555	911	0	81	FEMALE	II	T3	M0	N0
TCGA-AA-3715	579	1	77	MALE	II	T3	M0	N0
TCGA-D5-6534	1316	0	62	FEMALE	II	T3	M0	N0
TCGA-DM-A28G	1849	1	75	MALE	II	T3	M0	N0
TCGA-AA-A00K	549	0	79	MALE	II	T3	M0	N0
TCGA-G4-6302	2047	1	90	FEMALE	II	T3	M0	N0
TCGA-CM-5349	335	0	68	FEMALE	II	T3	M0	N0
TCGA-T9-A92H	362	0	82	MALE	II	T3	M0	N0
TCGA-CK-6746	0	0	84	FEMALE	II	T4b	MX	N0
TCGA-AZ-6598	1503	1	77	FEMALE	II	T3	MX	N0
TCGA-AA-3655	1856	0	68	MALE	II	T3	M0	N0
TCGA-CK-4951	2134	1	79	FEMALE	II	T3	M0	N0
TCGA-G4-6626	1422	1	90	MALE	II	T3	M0	N0
TCGA-G4-6588	796	0	58	FEMALE	II	T3	M0	N0
TCGA-AA-3845	0	1	86	FEMALE	II	T3	M0	N0
TCGA-AA-3532	882	0	63	MALE	II	T3	M0	N0
TCGA-AZ-4315	1776	0	61	MALE	II	T3	M0	N0
TCGA-AA-3856	30	0	59	MALE	II	T3	M0	N0
TCGA-D5-6920	377	0	77	FEMALE	II	T3	M0	N0
TCGA-SS-A7HO	1829	0	44	FEMALE	II	T4a	M0	N0
TCGA-AA-3864	1612	0	71	MALE	II	T3	M0	N0
TCGA-A6-5661	306	0	80	FEMALE	II	T3	M0	N0
TCGA-QG-A5YX	1003	0	61	FEMALE	II	T3	MX	N0
TCGA-AA-3522	1127	0	67	MALE	II	T3	M0	N0
TCGA-AA-A022	0	0	88	FEMALE	II	T4	M0	N0
TCGA-A6-5665	404	0	84	FEMALE	II	T3	M0	N0
TCGA-D5-6932	346	0	69	MALE	II	T3	M0	N0
TCGA-D5-6531	540	0	75	MALE	II	T3	M0	N0
TCGA-AA-A01Q	31	0	48	FEMALE	II	T3	M0	N0
TCGA-AA-3815	1005	0	65	FEMALE	II	T3	M0	N0
TCGA-G4-6627	1434	0	84	MALE	II	T3	M0	N0
TCGA-AY-A69D	543	0	55	FEMALE	II	T3	M0	N0
TCGA-AA-3675	1431	0	84	MALE	II	T3	M0	N0
TCGA-AA-A00L	1157	0	66	MALE	II	T3	M0	N0
TCGA-NH-A8F7	543	0	53	FEMALE	II	T3	MX	N0
TCGA-A6-2679	595	0	73	FEMALE	II	T3	unknown	N0
TCGA-DM-A1D6	1518	1	88	MALE	II	T3	M0	N0
TCGA-A6-6140	356	0	62	MALE	II	T3	M0	N0
TCGA-CA-5256	65	0	54	FEMALE	II	T3	M0	N0
TCGA-A6-2680	522	0	72	FEMALE	II	T3	M0	N0
TCGA-AA-A00A	1157	0	80	MALE	II	T3	M0	N0
TCGA-DM-A280	236	1	70	FEMALE	II	T3	M0	N0
TCGA-CM-5860	304	0	44	MALE	II	T3	M0	N0
TCGA-AA-3841	1124	0	66	MALE	II	T3	M0	N0
TCGA-AA-A02R	670	1	84	FEMALE	II	T3	M0	N0
TCGA-D5-6536	543	0	73	MALE	II	T3	M0	N0
TCGA-A6-2676	447	0	75	FEMALE	II	T4	M0	N0
TCGA-AA-3994	822	0	69	MALE	III	T3	M0	N1
TCGA-CM-6680	91	0	78	FEMALE	III	T3	M0	N2a
TCGA-AA-3525	245	0	90	MALE	III	T3	M0	N1
TCGA-A6-A5ZU	293	0	59	MALE	III	T3	M0	N1
TCGA-A6-5657	367	0	65	MALE	III	T3	M0	N1
TCGA-CK-5914	669	0	81	MALE	III	T3	MX	N1
TCGA-CK-4948	3116	0	45	FEMALE	III	T3	M0	N1
TCGA-AA-3516	396	1	74	FEMALE	III	T3	M0	N2
TCGA-D5-6926	275	0	65	MALE	III	T4a	M0	N1
TCGA-DM-A288	427	1	68	MALE	III	T3	M0	N2
TCGA-CM-6167	122	0	57	FEMALE	III	T3	M0	N2b
TCGA-AA-3560	608	0	72	FEMALE	III	T3	M0	N2
TCGA-AA-3712	0	0	65	MALE	III	T3	M0	N2
TCGA-G4-6320	804	0	73	MALE	III	T3	MX	N1
TCGA-AA-A01D	334	1	47	FEMALE	III	T3	M0	N2
TCGA-AA-A01P	1158	1	80	FEMALE	III	T3	M0	N1
TCGA-AA-A01C	457	0	75	MALE	III	T2	M0	N1
TCGA-G4-6299	2268	0	69	MALE	III	T3	M0	N2
TCGA-QG-A5Z1	256	1	71	MALE	III	T3	MX	N1b
TCGA-A6-2677	541	0	68	FEMALE	III	T3	M0	N2
TCGA-AA-3982	822	0	75	MALE	III	T3	M0	N1
TCGA-CM-4748	214	0	53	MALE	III	T4a	M0	N1a
TCGA-A6-2678	437	0	43	FEMALE	III	T3	M0	N1
TCGA-AA-3552	396	1	85	MALE	III	T3	M0	N2
TCGA-NH-A6GB	476	0	71	FEMALE	III	T3	MX	N2b
TCGA-D5-5539	596	0	60	MALE	III	T3	M0	N1
TCGA-CK-4947	534	0	46	FEMALE	III	T4	M0	N1
TCGA-CM-6162	212	0	48	FEMALE	III	T3	M0	N1a
TCGA-AA-3860	945	0	53	FEMALE	III	T3	M0	N1
TCGA-DM-A1DA	228	1	71	FEMALE	III	T3	M0	N2
TCGA-F4-6461	338	1	41	FEMALE	III	T4b	M0	N2
TCGA-D5-6537	146	1	64	MALE	III	T3	MX	N1a
TCGA-D5-5541	350	0	63	MALE	III	T3	M0	N1a
TCGA-AA-A03F	549	1	90	FEMALE	III	T3	M0	N2
TCGA-DM-A1HA	4000	0	82	MALE	III	T3	M0	N2
TCGA-AZ-4308	2048	0	47	FEMALE	III	T3	M0	N1
TCGA-F4-6807	494	0	51	FEMALE	III	T3	M0	N2b
TCGA-CM-5341	273	0	82	FEMALE	III	T2	M0	N1a
TCGA-A6-5667	320	0	40	FEMALE	III	T3	MX	N1a
TCGA-AY-4070	496	1	50	FEMALE	III	T3	M0	N2
TCGA-QG-A5YW	896	0	55	FEMALE	III	T3	MX	N2b
TCGA-4N-A93T	146	0	67	MALE	III	T4a	M0	N1b
TCGA-CK-4952	475	0	48	FEMALE	III	T4	M0	N2
TCGA-D5-6538	521	0	79	FEMALE	III	T3	M0	N2
TCGA-AA-3844	454	0	78	FEMALE	III	T3	M0	N2
TCGA-AZ-6608	59	1	55	FEMALE	III	T2	M0	N1
TCGA-DM-A28F	1094	1	73	MALE	III	T3	M0	N1
TCGA-A6-6649	328	0	66	MALE	III	T3	M0	N1b
TCGA-NH-A6GA	302	1	58	MALE	III	T4a	MX	N2a
TCGA-AZ-4615	1002	0	84	MALE	III	T3	M0	N1
TCGA-G4-6322	792	0	65	MALE	III	T3	MX	N1
TCGA-CM-5344	304	0	39	FEMALE	III	T3	M0	N1b
TCGA-CA-6715	383	0	63	MALE	III	T3	M0	N1
TCGA-F4-6459	262	1	61	FEMALE	III	T3	M0	N2a
TCGA-A6-5660	342	0	73	MALE	III	T3	M0	N2b
TCGA-RU-A8FL	1177	0	51	MALE	III	T3	MX	N2a
TCGA-QG-A5YV	1301	0	64	FEMALE	III	T4b	MX	N1a
TCGA-AA-3681	182	0	77	FEMALE	III	T3	M0	N1
TCGA-AA-3848	306	1	82	FEMALE	III	T3	M0	N2
TCGA-CM-5863	304	0	60	FEMALE	III	T3	M0	N1b
TCGA-CM-5348	393	0	72	MALE	III	T3	M0	N1a
TCGA-D5-6535	460	0	80	FEMALE	III	T3	MX	N1
TCGA-F4-6704	47	0	60	MALE	III	T3	MX	N2b
TCGA-A6-A566	758	1	55	FEMALE	III	T4	M0	N1
TCGA-A6-6654	399	0	65	FEMALE	III	T3	M0	N1
TCGA-A6-3807	333	0	53	FEMALE	III	T3	M0	N2
TCGA-AA-3955	638	0	38	MALE	III	T2	M0	N2a
TCGA-A6-6781	293	0	43	MALE	III	T4b	MX	N1b
TCGA-F4-6460	407	0	51	FEMALE	III	T3	M0	N1
TCGA-AZ-6605	159	1	77	MALE	III	T4	M0	N1
TCGA-A6-5664	362	0	80	MALE	III	T4a	MX	N2a
TCGA-AA-A01R	1065	0	47	MALE	III	T3	M0	N2
TCGA-AD-6899	176	1	84	MALE	III	T4a	MX	N2b
TCGA-AA-3949	791	0	87	FEMALE	III	T3	M0	N1
TCGA-DM-A1HB	4126	0	75	MALE	III	T3	M0	N1
TCGA-D5-6931	365	0	77	MALE	III	T4b	M0	N2
TCGA-AA-3952	61	1	68	MALE	III	T3	M0	N2
TCGA-D5-5538	373	0	60	FEMALE	III	T3	M0	N1b
TCGA-AA-A00U	518	0	50	MALE	III	T3	M0	N1
TCGA-AA-A01S	31	0	47	FEMALE	III	T3	M0	N1
TCGA-AA-3562	608	0	82	MALE	III	T3	M0	N2
TCGA-AA-A01T	1005	0	63	FEMALE	III	T3	M0	N1
TCGA-AA-A00Q	1278	0	66	FEMALE	III	T4	M0	N1
TCGA-AA-A01K	943	0	74	FEMALE	III	T3	M0	N2
TCGA-AA-3672	28	0	90	FEMALE	III	T3	M0	N1
TCGA-AA-A01X	791	0	80	FEMALE	III	T2	M0	N1
TCGA-AA-A00J	549	0	80	MALE	III	T4	M0	N1
TCGA-G4-6311	1199	0	80	MALE	III	T3	MX	N1
TCGA-A6-A565	494	1	34	FEMALE	III	T3	MX	N2
TCGA-DM-A28A	805	1	78	MALE	III	T3	M0	N2
TCGA-AA-3811	306	1	84	FEMALE	III	T3	M0	N2
TCGA-CM-6172	212	0	70	FEMALE	III	T3	M0	N1a
TCGA-G4-6298	715	1	90	MALE	III	T4a	MX	N1
TCGA-G4-6317	1095	0	51	FEMALE	III	T3	MX	N2
TCGA-AY-6386	360	0	66	FEMALE	III	T3	M0	N1a
TCGA-AA-3976	791	0	70	MALE	III	T2	M0	N1
TCGA-AD-6965	805	0	62	MALE	III	T4a	M0	N2b
TCGA-AA-3842	1126	0	51	MALE	III	T2	M0	N1
TCGA-A6-2672	503	0	82	FEMALE	III	T3	M0	N1
TCGA-AA-A00O	822	0	83	FEMALE	III	T3	M0	N2
TCGA-CM-4750	244	0	34	FEMALE	III	T1	M0	N1b
TCGA-G4-6309	1574	0	40	FEMALE	III	T3	M0	N1
TCGA-A6-6651	259	0	55	FEMALE	III	T3	MX	N1b
TCGA-CM-4751	607	0	62	MALE	III	T3	M0	N1b
TCGA-G4-6307	1674	0	37	FEMALE	III	T3	M0	N1
TCGA-A6-4107	231	0	57	FEMALE	III	T3	M0	N1b
TCGA-AD-6895	763	0	84	MALE	III	T3	M0	N1a
TCGA-DM-A28H	3561	0	50	MALE	III	T3	M0	N2
TCGA-AD-6888	472	1	73	MALE	III	T3	M0	N1b
TCGA-AY-6196	6	0	47	MALE	III	T3	unknown	N2b
TCGA-G4-6310	1372	0	69	MALE	III	T3	M0	N1
TCGA-AA-3529	0	1	78	FEMALE	III	T3	M0	N2
TCGA-D5-6922	308	0	76	MALE	III	T3	M0	N1
TCGA-AA-A00F	1035	0	66	MALE	III	T3	M0	N2
TCGA-AA-3666	61	1	68	MALE	III	T3	M0	N1
TCGA-G4-6321	672	0	60	FEMALE	III	T2	MX	N1
TCGA-DM-A0XF	1162	1	68	FEMALE	III	T3	M0	N2
TCGA-G4-6293	3275	0	49	FEMALE	III	T3	M0	N1
TCGA-AA-3542	395	0	69	MALE	III	T3	M0	N2
TCGA-CK-4950	1227	0	68	FEMALE	III	T3	M0	N1
TCGA-A6-6137	348	0	55	MALE	III	T3	M0	N1c
TCGA-AA-3548	1034	0	71	FEMALE	III	T3	M0	N2
TCGA-A6-A56B	1711	1	57	MALE	III	T3	M0	N1
TCGA-AA-3971	489	0	58	MALE	III	T3	M0	N1
TCGA-AA-3678	1430	0	60	FEMALE	III	T2	M0	N1
TCGA-NH-A50V	588	0	69	MALE	III	T3	M0	N2a
TCGA-AA-3519	276	0	63	MALE	III	T3	M0	N1
TCGA-AA-A01F	974	0	72	MALE	III	T3	M0	N1
TCGA-CM-6678	122	0	63	FEMALE	IV	T4a	M1a	N1c
TCGA-5M-AAT6	290	1	40	FEMALE	IV	T4a	M1a	N2b
TCGA-D5-6929	408	0	49	FEMALE	IV	T3	M1	N1
TCGA-CM-6675	153	0	35	MALE	IV	T3	M1b	N2b
TCGA-CM-4747	244	0	47	MALE	IV	T4a	M1a	N1b
TCGA-G4-6314	1093	0	76	FEMALE	IV	T3	M1	N2
TCGA-AA-3692	1095	1	47	FEMALE	IV	T3	M1	N2
TCGA-NH-A6GC	389	0	66	FEMALE	IV	T4b	M1b	N1b
TCGA-F4-6809	403	1	52	FEMALE	IV	T3	M1	N1
TCGA-A6-2683	472	0	57	FEMALE	IV	T4	M1	N0
TCGA-AZ-4614	172	1	71	FEMALE	IV	T4a	M1	N1
TCGA-AZ-4323	43	1	37	MALE	IV	T4	M1	N2
TCGA-AA-3930	61	1	66	MALE	IV	T3	M1	N2
TCGA-AA-3872	0	0	45	MALE	IV	T4	M1	N2
TCGA-AA-3941	730	0	84	FEMALE	IV	T4	M1a	N1b
TCGA-AY-A8YK	573	0	44	MALE	IV	T3	M1	N2a
TCGA-A6-6142	368	0	56	FEMALE	IV	T3	M1a	N1a
TCGA-AZ-6600	368	1	64	MALE	IV	T4	M1	N1
TCGA-G4-6297	2506	0	55	FEMALE	IV	T3	M1	N2
TCGA-AA-3989	242	1	84	MALE	IV	T3	M1	N2
TCGA-A6-2674	523	0	71	MALE	IV	T3	M1	N2
TCGA-AA-3662	184	0	80	FEMALE	IV	T4	M1	N2
TCGA-A6-2671	648	0	85	MALE	IV	T3	M1	N2
TCGA-AA-3494	31	0	55	MALE	IV	T3	M1	N0
TCGA-G4-6315	1117	0	66	MALE	IV	T3	M1	N1
TCGA-AA-A02K	426	1	50	MALE	IV	T4	M1	N2
TCGA-AA-3696	153	1	75	FEMALE	IV	T3	M1	N1
TCGA-AY-5543	479	0	65	FEMALE	IV	T3	M1	N1a
TCGA-AA-A02H	61	1	74	FEMALE	IV	T3	M1	N2
TCGA-5M-AAT4	49	1	74	MALE	IV	T3	M1b	N0
TCGA-G4-6294	858	1	75	MALE	IV	T3	M1	N1
TCGA-AA-3972	1551	0	72	MALE	IV	T3	M1	N1
TCGA-CM-5862	153	1	80	MALE	IV	T3	M1a	N1a
TCGA-AZ-4682	680	1	61	MALE	IV	T3	M1	N0
TCGA-AA-3679	457	0	59	MALE	IV	T3	M1	N2
TCGA-AZ-6606	357	1	81	MALE	IV	T4	M1	N2
TCGA-DM-A285	179	1	71	FEMALE	IV	T3	M1	N2
TCGA-AZ-4616	156	1	82	FEMALE	IV	T3	M1	N2
TCGA-AA-3867	731	0	74	MALE	IV	T3	M1	N2
TCGA-A6-6648	344	0	56	MALE	IV	T3	M1a	N0
TCGA-A6-6652	456	0	59	MALE	IV	T3	M1	N0
TCGA-AA-3684	0	0	65	FEMALE	IV	T4	M1	N2
TCGA-AA-3488	153	1	58	MALE	IV	T3	M1	N2
TCGA-A6-A567	1881	1	56	MALE	IV	T3	M1	N1
TCGA-AA-3680	335	1	67	FEMALE	IV	T4	M1	N2
TCGA-CM-5868	426	0	59	FEMALE	IV	T4a	M1a	N1a
TCGA-AZ-4684	1977	0	49	MALE	IV	T3	M1	N2
TCGA-A6-5662	453	0	46	MALE	IV	T3	M1	N2
TCGA-AA-3869	822	1	76	MALE	IV	T4	M1	N2
TCGA-AA-A02F	1216	0	68	FEMALE	IV	T3	M1	N1
TCGA-AA-3688	578	0	80	MALE	IV	T3	M1	N1
TCGA-AZ-6607	97	1	69	MALE	IV	T4	M1	N2
TCGA-AM-5820	14	0	59	FEMALE	IV	T4a	M1	N2
TCGA-AA-3973	397	0	69	MALE	IV	T4	M1	N1
TCGA-AA-A02J	153	1	70	FEMALE	IV	T3	M1	N0
TCGA-NH-A8F8	511	1	79	MALE	IV	T4a	M1	N2b
TCGA-CK-6748	61	0	45	FEMALE	IV	T3	M1	N1
TCGA-AA-A02E	90	1	82	FEMALE	IV	T3	M1	N1
TCGA-AA-3713	579	0	68	MALE	IV	T3	M1	N0
TCGA-G4-6303	2003	1	54	FEMALE	IV	T3	M1	N1
TCGA-NH-A50U	334	1	42	MALE	IV	T4a	M1a	N0
TCGA-A6-2682	424	1	70	MALE	IV	T4b	M1	N1
TCGA-AA-3870	912	0	71	FEMALE	IV	T3	M1	N2
TCGA-AA-3693	0	0	77	FEMALE	IV	T4	M1	N1
